# Supplementary material
Source: PubMed Central journal article supplement (PMC8127730)
Supplement: NIHMS1668590-supplement-Supplemental_Publication_Material.pdf [file NIHMS1668590-supplement-Supplemental_Publication_Material.pdf]

## **Supplemental Material**

**Supplemental Methods:** Methodology of chart reviews in subgroup analysis

**Supplemental Methods:** Agreement in chart review diagnosis by 5 reviewers

**Supplemental Methods:** Reviewer Instructions

**Supplemental Figure I:** Proportion of Type 1 MI among UCH subgroup patients (n=645)

**Supplemental Table I:** Diagnosis related groups (DRG) and international classification of diseases, 10<sup>th</sup> revision (ICD-10) codes used for AMI cohort inclusion.

**Supplemental Table II:** Baseline characteristics in UCHealth (entire study cohort) compared to the UCH Subgroup

**Supplemental Table III.** Multivariate comparison of quality measures and rates of resource utilization among different AMI cohorts (sensitivity analysis)

**Supplemental Table IV:** Top 10 ICD-10 diagnoses in the DRG cohort (n = 662).

**Supplemental Table V:** Top 10 DRG assignments in the ICD-10 cohort (n=1935).

**Supplemental Table VI:** DRG group assigned to patients in subgroup analysis.

**Supplemental Table VII:** Tables for Cohen's Kappa calculations for UCH subgroup analysis

## **Supplemental Methods:** methodology of chart reviews in subgroup analysis

Chart reviews in the subgroup analysis were performed by 5 clinicians (AEL, KSR, NMB, EWR, JDR), who were blinded to patients' ICD-10 codes and DRG assignment. Clinical information was collected from the electronic health record (EHR) and study data were collected and managed using REDCap electronic data capture tools hosted at the University of Colorado Clinical and Translational Sciences Institute (CCTSI).<sup>31-32</sup> Health information that was reviewed included the discharge summary, clinician notes, test reports, procedure reports and laboratory studies.

The goal of chart reviews was to categorize each UCH patient encounter into one of three categories based on the Fourth Universal Definition of MI<sup>6</sup>: Type 1 MI (T1MI), Type 2 MI (T2MI) or non-ischemic myocardial injury (NIMI). The following criteria were used:

T1MI encounters met the following three criteria: 1) biomarker evidence of acute myocardial injury, defined as an elevated troponin level (per cohort definition above) and evidence of at least a twenty percent difference between peak and trough troponin levels, using the peak as the reference; 2) signs or symptoms of acute myocardial ischemia were present (see **Supplemental Methods 1** for further details); and 3) clinical suspicion or procedural confirmation of intracoronary atherothrombotic plaque rupture as the etiologic cause of AMI.

T2MI encounters met the following three criteria: 1) biomarker evidence of acute myocardial injury per the T1MI definition; 2) AMI signs or symptoms per the T1MI definition; 3) clinical suspicion of mismatch between myocardial oxygen supply and demand caused by a "severe illness" unrelated to acute coronary atherothrombosis. Cases in which coronary disease was obstructive (>70%) were categorized as T1MI unless a preponderance of evidence in the chart, and the treating clinicians' notes, suggested T2MI.

NIMI encounters met the following criteria: 1) lack of biomarker evidence of acute myocardial injury or 2) lack of signs or symptoms of ischemia as defined above.

In order to maximize agreement between reviewers, methods for chart reviews in the subgroup analysis were discussed and agreed upon by all reviewers. This included instructions on the specific criteria for each of the signs and symptoms of AMI, as well as regarding the criteria for "severe illness" that might qualify as a cause of T2MI (see pages 2-3). Agreement between reviewers regarding the diagnosis of T1MI versus non-T1MI was assessed based on independent review of twenty randomly selected cases by each of the five reviewers: dual-comparison kappa scores revealed perfect agreement between all reviewer pairs.

**Supplemental Methods:** agreement in chart review diagnosis by 5 reviewers

| Test Patient     | EWR                              | JDR | NMB | AEL | KSR |
|------------------|----------------------------------|-----|-----|-----|-----|
| 1                | 1                                | 1   | 1   | 1   | 1   |
| 2                | 0                                | 0   | 0   | 0   | 0   |
| 3                | 0                                | 0   | 0   | 0   | 0   |
| 4                | 0                                | 0   | 0   | 0   | 0   |
| 5                | 0                                | 0   | 0   | 0   | 0   |
| 6                | 0                                | 0   | 0   | 0   | 0   |
| 7                | 1                                | 1   | 1   | 1   | 1   |
| 8                | 0                                | 0   | 0   | 0   | 0   |
| 9                | 0                                | 0   | 0   | 0   | 0   |
| 10               | 1                                | 1   | 1   | 1   | 1   |
| 11               | 0                                | 0   | 0   | 0   | 0   |
| 12               | 1                                | 1   | 1   | 1   | 1   |
| 13               | 1                                | 1   | 1   | 1   | 1   |
| 14               | 1                                | 1   | 1   | 1   | 1   |
| 15               | 0                                | 0   | 0   | 0   | 0   |
| 16               | 0                                | 0   | 0   | 0   | 0   |
| 17               | 1                                | 1   | 1   | 1   | 1   |
| 18               | 0                                | 0   | 0   | 0   | 0   |
| 19               | 1                                | 1   | 1   | 1   | 1   |
| 20               | 1                                | 1   | 1   | 1   | 1   |
| 20 test patients | 1 = Type 1 MI, 0 = not Type 1 MI |     |     |     |     |

| Rater A      | Rater B | Cohen's Kappa | Agreement   |
|--------------|---------|---------------|-------------|
| EWR          | JDR     | 1.00          | 100%        |
| EWR          | NMB     | 1.00          | 100%        |
| EWR          | AEL     | 1.00          | 100%        |
| EWR          | KSR     | 1.00          | 100%        |
| JDR          | NMB     | 1.00          | 100%        |
| JDR          | AEL     | 1.00          | 100%        |
| JDR          | KSR     | 1.00          | 100%        |
| NMB          | AEL     | 1.00          | 100%        |
| NMB          | KSR     | 1.00          | 100%        |
| AEL          | KSR     | 1.00          | 100%        |
| <b>Group</b> |         | <b>1.00</b>   | <b>100%</b> |

\*Part of a subgroup analysis of all patients cared for at the University of Colorado Hospital (UCH).

Supplemental Methods: chart reviewer instructions, page 1.

## Knowin Troponin: Guide to RedCap & Chart Reviews

After logging into the Knowin Troponin RedCap & Epic EHR ...

- 1) "Record Status Dashboard" (left toolbar)
  - a. Click "default dashboard"
  - b. Select your name
  - c. This is your random list.

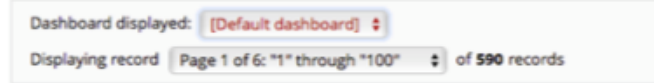

- 2) Click "Patient station" to pull up the appropriate Encounter

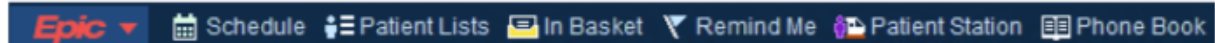

- 3) Custom search based on the CSN listed in the RedCap.

**CSN**

This will let you open the encounter from admission so you can do straight to the "Notes" section and read the **discharge summary**.

**\*\*no DC summary? Don't review, email A/K record #**

**122381324**

Select Patient Custom Search Recent Patients

Name/MRN:

csn:

Sex:

Transplant:

Use sounds-like  My patients

- 4) Discharge summary
  - a. Match DC date to "Encounter Info" in RedCap
    - i. Make sure you're in the right encounter
  - b. Get the first 3-7 fields, should be easy.
  - c. MI diagnosis: check all things described even if not verified.
  - d. Note of any "severe" illnesses
- 5) Examine data: EKG, Stress, Echo, Cath, etc. as well as other notes/data prn.
  - a. In general, you should only have to **review the above if** the DC summary:
    - i. **mentions  $\leq 1$  MI criterion**. e.g. TWI mentioned but nothing else.
    - ii. **documents poorly so unclear if "severe illness"** e.g. no mention of troponin elevation
  - b. Make sure you're reviewing data from **appropriate date/encounter!**
  - c. Use criteria on **page 2** for MI diagnostic criteria
    - i. if you're spending  $>10$  mins per record on average, let us know!
    - ii. if you're stuck, don't spin your wheels, email questions to **A/K (we expect this)**
- 6) Make any additional comments as needed.
- 7) Scroll to very bottom of the form, change "Incomplete" status to "Unverified"

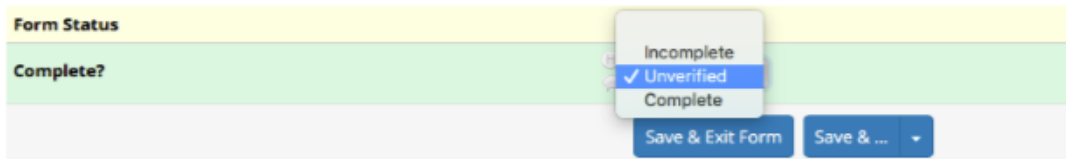

- 8) "Save and Exit Form"
- 9) Click "Record Status Dashboard" → this will take you back to your individual dashboard/record list

## Supplemental Methods: chart reviewer instructions, page 2.

### **Chart Reviews: Criteria for Diagnosis**

First, a word about “**intracoronary thrombus**” and “**severe illness.**”

- If a stent was placed, assume intracoronary thrombus was present, **unless**:
  - o Notes suspicious for supply-demand mismatch → be sure to document the “severe illness”
  - o **Dissection (SCAD), Spasm & Emboli** all count as “severe illness” ~ these are Type 2’s
- If you’re unsure whether something is really a “severe illness”, email A/K the record number.
  - o e.g. a **post-op** patient with **intracoronary thrombus**, I would **not** document a “severe illness”
    - you can say in “Other notes” that the patient was post-op.
  - o e.g. a **post-op** patient with no cath or imaging changes → call it a “severe illness”
  - o *If this seems like a form of bias, it is! But it’s not our bias, it’s the clinicians’ / reporters’ bias.*

### **acute/subacute Ischemic symptoms**

- Classic: acute (mins-hours) or subacute (days) onset **Chest pain** or **dyspnea** or **SOB**
  - o +/- diaphoresis, nausea, jaw pain, arm pain
  - o **AND absence of an obvious cause** (PE, COPD exacerbation, etc.)
- Atypical: Epigastric pain/burning, Nausea, Diaphoresis, or Unexplained syncope
  - o **AND absence of a more likely cause**

### **new Ischemic ECG changes**

- Remember, must be **new** or **dynamic (changing)**
  - o ST-elevation at the J-point (40 ms after R) in **≥ 2 contiguous leads**
    - V2-V3
      - ≥ 2mm in men ≥ 40 years
      - ≥ 2.5 mm in men < 40 years
      - ≥ 1.5 mm in women regardless of age
    - **All other leads: ≥ 1 mm**
  - o ST-depression and T wave changes in **≥ 2 contiguous leads**
    - New horizontal or downsloping ST-depression **≥ 0.5 mm**
    - T-wave inversion **> 1 mm** with prominent R wave or R/S ratio > 1.
      - **Exclude TWI** if criteria for LVH met.
- Email **A/K** to adjudicate if...
  - new LBBB **and** prior ECG without LBBB
  - new pathologic q waves (precordial only) **and** prior ECG without q waves
  - Ventricular arrhythmia or Cardiac arrest without other changes.

### **new Ischemic imaging changes:**

- Try to **correlate anatomically** e.g. RCA lesion should cause → inferior WMA/defect
- It’s **NEW** if no prior documentation
  - o **Echo/MRI**: wall motion abnormality, not on prior imaging if we have any.
    - can’t be re: asynchrony/bundle branch block or other rhythm issue (will say in report).
  - o **New loss of “viable” myocardium**
    - **NEW infarct** (with old for comparison) or **Reversible** defect (not due to artifact)

### **Intracoronary thrombus on angiography**

- If a stent was placed, assume intracoronary thrombus was present, **unless**:
  - o Notes suspicious for supply-demand mismatch → be sure to document the “severe illness”
  - o **Dissection (SCAD), Spasm & Emboli** all count as “severe illness” ~ these are Type 2’s
- If a stent wasn’t placed, but report/notes mention “acute lesion” or similar → count as thrombus
- If MI criteria met, but no coronary disease **and** no “severe illness” → write **MINOCA** in “Other Notes”
  - o send number to **A/K**

**Supplemental Figure I:** Proportion of Type 1 MI among UCH subgroup patients (n=645) in ICD10 cohort only (left), DRG cohort only (right) and both DRG and ICD10 cohorts (middle).

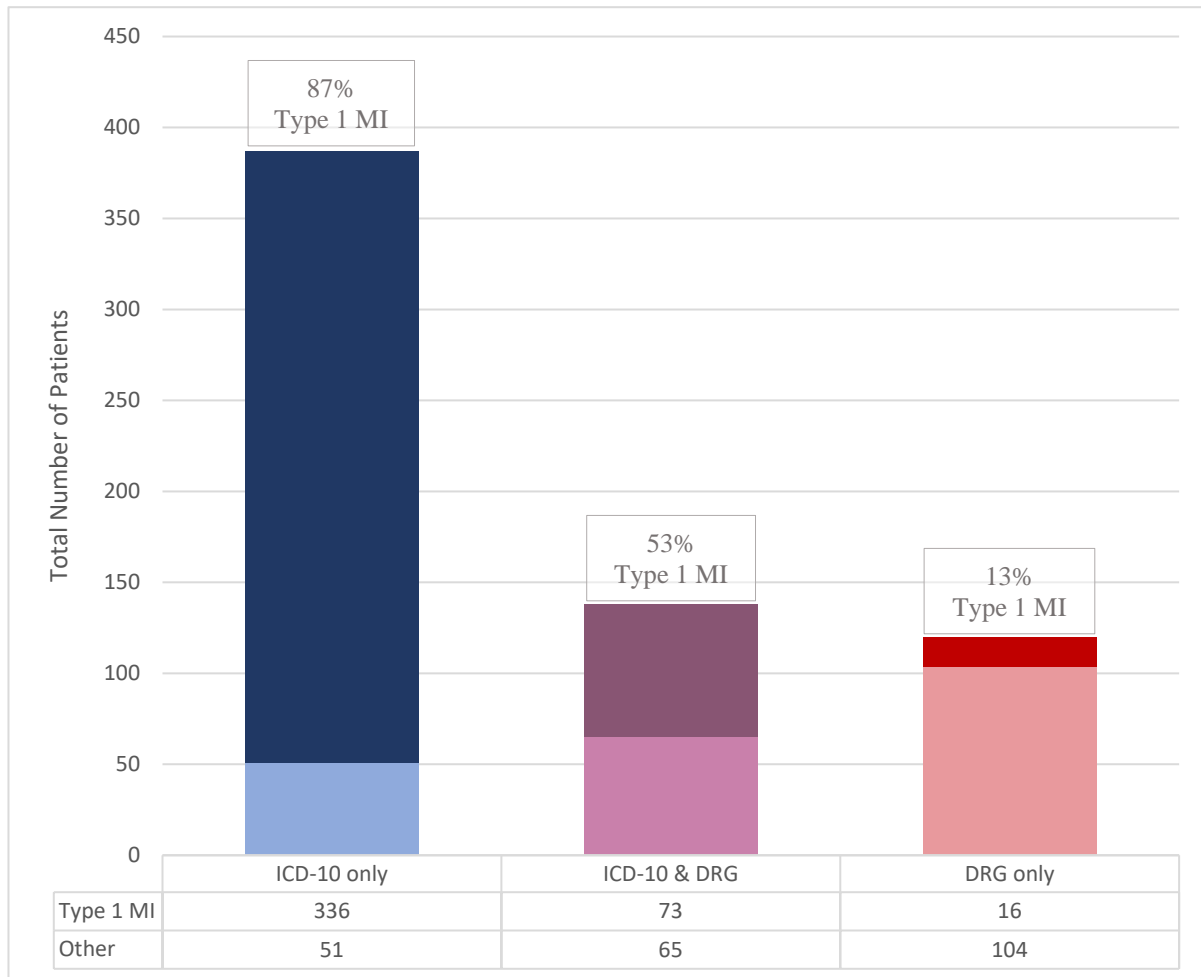

\*Part of a subgroup analysis of all patients cared for at the University of Colorado Hospital (UCH).

Abbreviations: UCH = University of Colorado Hospital, DRG = diagnosis related group; ICD-10 = international classification of diseases, 10<sup>th</sup> revision; Type 1 MI = Type 1 myocardial infarction.

**Supplemental Table I.** Diagnosis related groups (DRG) and international classification of diseases, 10<sup>th</sup> revision (ICD-10) codes used for inclusion in the AMI DRG and AMI ICD-10 cohorts, respectively. Of note, principal discharge diagnosis codes were used. Inclusion in each AMI cohort was designed to simulate a value-based payment program for AMI. DRG classes for AMI were chosen to align with inclusion criteria for the BPCI Advanced program.<sup>3</sup> Principal discharge ICD-10 codes for AMI were chosen to align with inclusion criteria for the VBP and HRRP programs.<sup>4,5</sup>

| DRGs included in DRG cohort |                                                                  | ICD-10 Codes included in ICD-10 cohort* |                                                                                               |
|-----------------------------|------------------------------------------------------------------|-----------------------------------------|-----------------------------------------------------------------------------------------------|
| Number                      | Description                                                      | Number                                  | Description                                                                                   |
| 280                         | Acute Myocardial Infarction without CC or MCC, discharged alive. | I21.01                                  | ST elevation (STEMI) myocardial infarction involving left main coronary artery                |
| 281                         | Acute Myocardial Infarction with CC, discharged alive.           | I21.02                                  | ST elevation (STEMI) myocardial infarction involving left anterior descending coronary artery |
| 282                         | Acute Myocardial Infarction with MCC, discharged alive.          | I21.09                                  | ST elevation (STEMI) myocardial infarction involving other coronary artery of anterior wall   |
|                             |                                                                  | I21.11                                  | ST elevation (STEMI) myocardial infarction involving right coronary artery                    |
|                             |                                                                  | I21.19                                  | ST elevation (STEMI) myocardial infarction involving other coronary artery of inferior wall   |
|                             |                                                                  | I21.21                                  | ST elevation (STEMI) myocardial infarction involving left circumflex coronary artery          |
|                             |                                                                  | I21.29                                  | ST elevation (STEMI) myocardial infarction involving other sites                              |
|                             |                                                                  | I21.3                                   | ST elevation (STEMI) myocardial infarction of unspecified site                                |
|                             |                                                                  | I21.4                                   | Non-ST elevation (NSTEMI) myocardial infarction                                               |

\*A March 2019 update to the ICD-10 codes used for the VBP and HRRP programs includes one additional code (I21.9) for “Acute Myocardial Infarction, unspecified” that was not used for our inclusion criteria.

Abbreviations: CC refers to Comorbid Condition; MCC refers to Major Comorbid Condition.

**Supplemental Table II: Baseline characteristics in UCHHealth (entire study cohort) compared to the UCH Subgroup**

|                           | UCHHealth excluding UCH | UCH                | p value |
|---------------------------|-------------------------|--------------------|---------|
| Total n                   | 1531 (100%)             | 645 (100%)         |         |
| <b>Demographics</b>       |                         |                    |         |
| Age (median)              | 66.23 (sd = 13.43)      | 64.38 (sd = 14.39) | 0.001   |
| Female                    | 469 (30.63%)            | 232 (35.97%)       | 0.111   |
| White or Caucasian        | 1323 (86.41%)           | 345 (53.49%)       | <0.001  |
| Cardiology Team           | 1240 (80.99%)           | 309 (47.91%)       | <0.001  |
| <b>Medical History</b>    |                         |                    |         |
| Diabetes Mellitus         | 550 (35.92%)            | 266 (41.24%)       | 0.007   |
| Hypertension              | 1213 (79.23%)           | 503 (77.98%)       | 0.703   |
| Hyperlipidemia            | 1148 (74.98%)           | 304 (47.13%)       | <0.001  |
| Heart Failure             | 512 (33.44%)            | 288 (44.65%)       | <0.001  |
| Peripheral Artery Disease | 69 (4.51%)              | 15 (2.33%)         | 0.019   |
| Prior Stroke              | 261 (17.05%)            | 133 (20.62%)       | 0.089   |
| COPD                      | 227 (14.83%)            | 116 (17.98%)       | 0.064   |
| Chronic Kidney Disease    | 375 (24.49%)            | 235 (36.43%)       | <0.001  |
| Dementia                  | 63 (4.11%)              | 31 (4.81%)         | 0.737   |
| Cancer                    | 298 (19.46%)            | 107 (16.59%)       | 0.063   |
| <b>Home Medications</b>   |                         |                    |         |
| Aspirin                   | 118 (7.71%)             | 81 (12.56%)        | 0.001   |
| P2Y12 Inhibitor           | 68 (4.44%)              | 48 (7.44%)         | 0.024   |
| Beta Blocker              | 128 (8.36%)             | 97 (15.04%)        | <0.001  |
| Any Statin                | 132 (8.62%)             | 91 (14.11%)        | <0.001  |
| ACEi, ARB, ARNI           | 109 (7.12%)             | 83 (12.87%)        | <0.001  |
| Oral Anticoagulation      | 28 (1.83%)              | 24 (3.72%)         | 0.033   |

Abbreviations: ACEi=angiotensin-converting enzyme inhibitor; ARB=angiotensin-receptor blocker; ARNI = angiotensin-receptor neprilysin inhibitor; COPD = chronic obstructive pulmonary disease; DOAC = direct oral anticoagulant; DRG = Diagnosis Related Group; ICD-10 = international classification of diseases, 10<sup>th</sup> revision; T1MI = Type 1 MI; UCH = University of Colorado Hospital.



**Supplemental Table III.** Multivariate comparison of quality measures and rates of resource utilization among different AMI cohorts (sensitivity analysis)

|                                 | <b>ICD-10</b>       | <b>DRG</b>                       | <b>*TIMI-UCH</b>   | <b>*ICD10-UCH</b>      | <b>*DRG-UCH</b>                  |
|---------------------------------|---------------------|----------------------------------|--------------------|------------------------|----------------------------------|
| Total n                         | 1935                | 662                              | 425                | 525                    | 258                              |
| <b>Outcome measures</b>         |                     |                                  |                    |                        |                                  |
| 1 year mortality                | 168 (8.7%)<br>ref   | 147 (22.2%)<br><b>p&lt;0.001</b> | 44 (10.4%)<br>ref  | 53 (10.1%)<br>p=0.169  | 61 (23.6%)<br><b>p=0.004</b>     |
| 30 day mortality                | 51 (2.64%)<br>ref   | 47 (7.1%)<br><b>p=0.034</b>      | 7 (1.7%)<br>ref    | 8 (1.5%)<br>p=0.158    | 13 (5.0%)<br><b>p=0.089</b>      |
| 90 day readmission              | 365 (18.9%)<br>ref  | 171 (25.8%)<br><b>p=0.753</b>    | 93 (21.9%)<br>ref  | 114 (21.7%)<br>p=0.233 | 68 (26.4%)<br>p=0.589            |
| 30 day readmission              | 269 (13.9%)<br>ref  | 123 (18.6%)<br>p=0.689           | 62 (14.6%)<br>ref  | 76 (14.5%)<br>p=0.462  | 45 (17.4%)<br>p=0.540            |
| <b>Medications administered</b> |                     |                                  |                    |                        |                                  |
| Aspirin                         | 1916 (99.0%)<br>ref | 622 (94.0%)<br><b>p&lt;0.001</b> | 424 (99.8%)<br>ref | 519 (98.9%)<br>p=0.992 | 235 (91.1%)<br><b>p=0.098</b>    |
| P2Y12 inhibitors                | 1579 (81.6%)<br>Ref | 295 (44.6%)<br><b>p&lt;0.001</b> | 340 (80.0%)<br>ref | 393 (74.9%)<br>p=0.680 | 98 (38.0%)<br><b>p&lt;0.001</b>  |
| High-dose Statin                | 1790 (92.5%)<br>ref | 531 (80.2%)<br><b>p&lt;0.001</b> | 407 (95.8%)<br>ref | 500 (95.2%)<br>p=0.993 | 219 (84.9%)<br><b>p&lt;0.001</b> |
| Beta Blocker                    | 1804 (93.2%)<br>ref | 553 (82.5%)<br><b>p&lt;0.001</b> | 401 (94.4%)<br>ref | 477 (90.9%)<br>p=0.668 | 197 (76.4%)<br><b>p&lt;0.001</b> |
| <b>Process measures</b>         |                     |                                  |                    |                        |                                  |
| Length of Stay                  | 4.03 days<br>ref    | 3.88 days<br><b>p=0.006</b>      | 5.81 days<br>ref   | 5.79 days<br>p=0.555   | 4.88 days<br><b>p&lt;0.001</b>   |
| Echocardiography                | 1294 (66.9%)<br>ref | 421 (63.6%)<br>p=0.055           | 218 (51.3%)<br>ref | 271 (51.6%)<br>p=0.552 | 122 (47.3%)<br>p=0.247           |
| Stress Test                     | 24 (1.2%)<br>ref    | 33 (5.0%)<br><b>p&lt;0.001</b>   | 9 (2.1%)<br>ref    | 20 (3.8%)<br>p=0.977   | 30 (11.6%)<br><b>p&lt;0.001</b>  |
| Cardiac CT                      | 7 (0.4%)<br>ref     | 11 (1.7%)<br><b>p=0.001</b>      | 3 (0.7%)<br>ref    | 4 (0.8%)<br>p=0.288    | 8 (3.1%)<br>p=0.991              |
| Cardiac MRI                     | 11 (0.6%)<br>ref    | 8 (1.2%)<br><b>p=0.999</b>       | 8 (1.9%)<br>ref    | 11 (2.1%)<br>p=0.999   | 7 (2.7%)<br>p=0.999              |
| Cardiac Catheterization         | 1262 (65.2%)<br>ref | 217 (32.8%)<br><b>p&lt;0.001</b> | 282 (66.4%)<br>ref | 323 (61.5%)<br>p=0.924 | 81 (31.4%)<br><b>p&lt;0.001</b>  |
| Cardiac rehabilitation referral | 1118 (57.8%)<br>ref | 148 (22.4%)<br><b>p&lt;0.001</b> | 68 (16.0%)<br>ref  | 79 (15.0%)<br>p=0.981  | 17 (6.6%)<br><b>P&lt;0.001</b>   |

\*Part of a subgroup analysis of all patients cared for at the University of Colorado Hospital (UCH). **Bolded** p values represent a change in statistical significance (using an alpha of 0.05) with multivariate analysis.

Abbreviations: CT = computed tomography; MRI = magnetic resonance imaging; DRG = diagnosis related group; ICD-10 = international classification of diseases, 10<sup>th</sup> revision; TIMI = Type 1 MI

**Supplemental Table IV:** Top 10 ICD-10 diagnoses in the DRG cohort (n = 662).

| <b>ICD-10 discharge</b> | <b>n</b> | <b>Description of ICD-10 code</b>                                                                                                                          |
|-------------------------|----------|------------------------------------------------------------------------------------------------------------------------------------------------------------|
| I21.4                   | 377      | Non-ST elevation (NSTEMI) myocardial infarction                                                                                                            |
| I21.A1                  | 60       | Myocardial infarction type 2                                                                                                                               |
| I13.0                   | 22       | Hypertensive heart and chronic kidney disease with heart failure and stage 1 through stage 4 chronic kidney disease, or unspecified chronic kidney disease |
| I11.0                   | 16       | Hypertensive heart disease with heart failure                                                                                                              |
| I21.19                  | 16       | ST elevation (STEMI) myocardial infarction involving other coronary artery of inferior wall                                                                |
| I21.09                  | 12       | ST elevation (STEMI) myocardial infarction involving other coronary artery of anterior wall                                                                |
| I13.2                   | 10       | Hypertensive heart and chronic kidney disease with heart failure and with stage 5 chronic kidney disease, or end stage renal disease                       |
| I16.1                   | 10       | Hypertensive emergency                                                                                                                                     |
| I50.23                  | 10       | Acute on chronic systolic (congestive) heart failure                                                                                                       |
| I21.3                   | 8        | ST elevation (STEMI) myocardial infarction of unspecified site                                                                                             |
| Other                   | 121      |                                                                                                                                                            |

**Supplemental Table V:** Top 10 DRG assignments in the ICD-10 cohort (n=1935).

| <b>DRG discharge</b> | <b>n</b> | <b>Description of DRG</b>                                                      |
|----------------------|----------|--------------------------------------------------------------------------------|
| 247                  | 655      | Percutaneous cardiovascular procedures with drug-eluting stent without MCC     |
| 246                  | 201      | Percutaneous cardiovascular procedures with drug-eluting stent with MCC        |
| 280                  | 180      | Acute myocardial infarction, discharged alive with MCC                         |
| 281                  | 157      | Acute myocardial infarction, discharged alive without MCC                      |
| 174                  | 155      | Percutaneous coronary intervention w AMI                                       |
| 249                  | 91       | Percutaneous cardiovascular procedures with non-drug-eluting stent without MCC |
| 282                  | 85       | Acute myocardial infarction, discharged alive without CC/MCC                   |
| 234                  | 60       | Coronary artery bypass with cardiac catheterization without MCC                |
| 233                  | 44       | Coronary artery bypass with cardiac catheterization with MCC                   |
| 190                  | 42       | Chronic obstructive pulmonary disease with MCC                                 |
| Other                | 265      |                                                                                |

**Supplemental Table VI:** DRG group assigned to patients in subgroup analysis by chart review diagnosis.

| <i>DRG Group</i> | <i>UCH Type 1 MI<br/>n=425</i> | <i>UCH Type 2 MI<br/>n=101</i> | <i>UCH NIMI<br/>n=119</i> |
|------------------|--------------------------------|--------------------------------|---------------------------|
| <i>AMI</i>       | 89 (21%)                       | 84 (83%)                       | 85 (71%)                  |
| <i>PCI</i>       | 189 (44%)                      | 5 (5%)                         | 14 (12%)                  |
| <i>CABG</i>      | 47 (11%)                       | 1 (1%)                         | 4 (3%)                    |
| <i>Other</i>     | 100 (24%)                      | 11 (11%)                       | 16 (14%)                  |

\*Part of a subgroup analysis of all patients cared for at the University of Colorado Hospital (UCH).

Abbreviations: AMI = acute myocardial infarction; CABG = coronary artery bypass grafting (CABG); DRG = diagnosis related group; PCI = percutaneous coronary intervention

**Supplemental Table VII:** Tables for Cohen’s Kappa calculations for UCH subgroup analysis\*

| Chart review | DRG  | ICD-10 – Y | ICD-10 – N |
|--------------|------|------------|------------|
| Type 1 MI    | AMI  | 73         | 16         |
| Type 1 MI    | PCI  | 189        | 0          |
| Type 1 MI    | CABG | 47         | 0          |
| Type 1 MI    | None | 100        | 0          |
| Type 2 MI    | AMI  | 34         | 50         |
| Type 2 MI    | PCI  | 5          | 0          |
| Type 2 MI    | CABG | 1          | 0          |
| Type 2 MI    | None | 11         | 0          |
| Non-ischemic | AMI  | 31         | 54         |
| Non-ischemic | PCI  | 14         | 0          |
| Non-ischemic | CABG | 4          | 0          |
| Non-ischemic | None | 16         | 0          |

| Comparison             | Both | Neither | (DRG or ICD-10) only | T1MI only | Total | % Agree | Kappa (95% CI)     |
|------------------------|------|---------|----------------------|-----------|-------|---------|--------------------|
| <b>T1MI vs. ICD-10</b> | 409  | 104     | 116                  | 16        | 645   | 79.5%   | 0.49 (0.42,0.56)   |
| <b>T1MI vs. DRG</b>    | 89   | 51      | 169                  | 336       | 645   | 21.7%   | -0.47 (-0.54,-0.4) |

\*Part of a subgroup analysis of all patients cared for at the University of Colorado Hospital (UCH).

Abbreviations: DRG = diagnosis related groups; ICD-10 = international classification of diseases, 10<sup>th</sup> revision; Non-ischemic = non-ischemic myocardial injury; T1MI = Type 1 myocardial infarction.
